# Supplementary material
Source: MDPI journal article supplement (https://www.mdpi.com/2072-4292/9/10/978)
Supplement: s1 [file s1]

NOAA HYSPLIT MODEL  
Backward trajectories ending at 0300 UTC 17 Jun 13  
GHDA Meteorological Data

Source ★ at 55.98 N 37.50 E

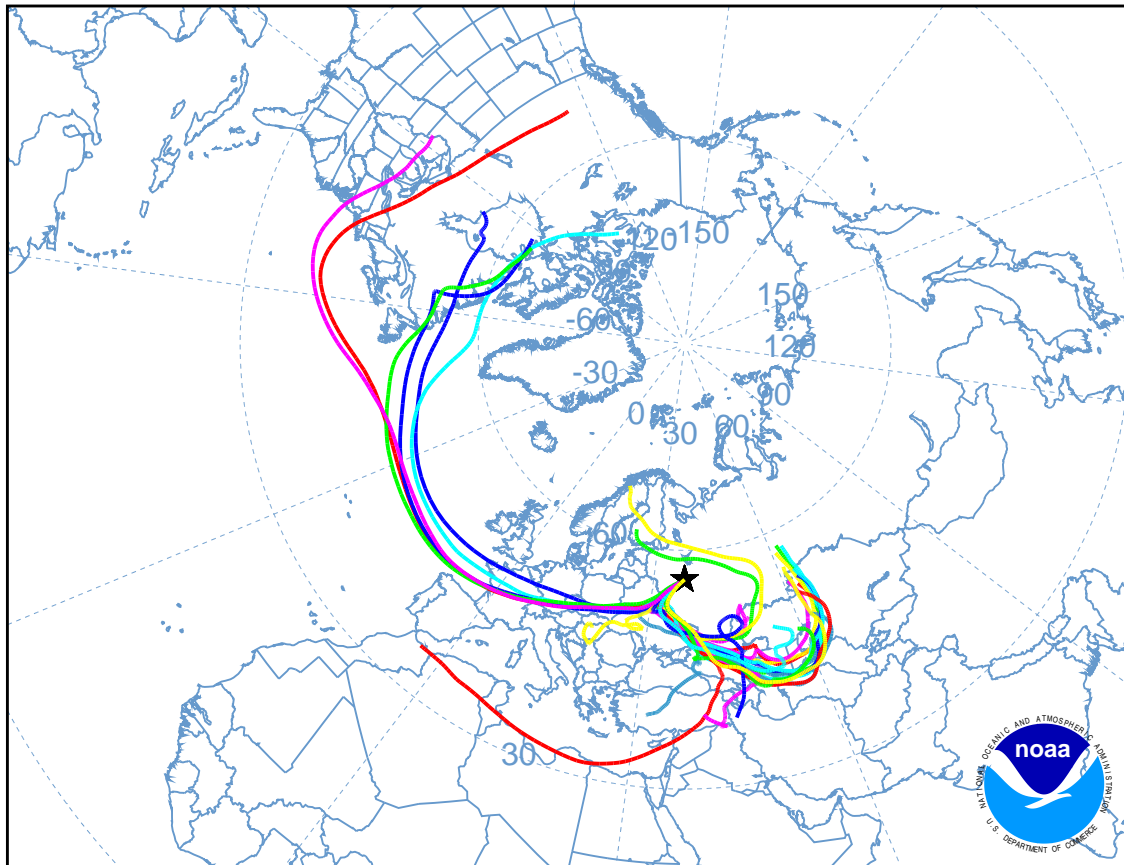

Meters AGL

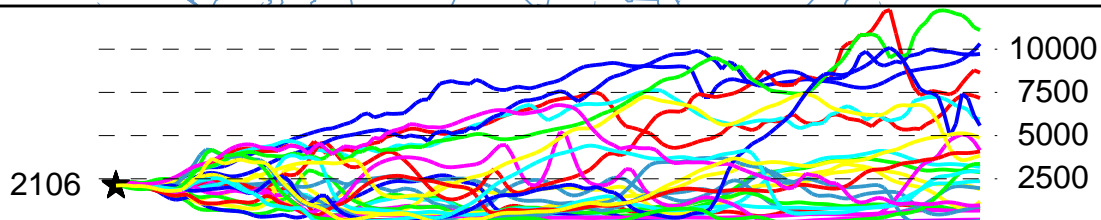

Job ID: 1284      Job Start: Mon Aug 21 09:17:57 UTC 2017  
Source 1    lat.: 55.980000    lon.: 37.500000    height: 2300 m AMSL

Trajectory Direction: Backward    Duration: 144 hrs  
Vertical Motion Calculation Method: Model Vertical Velocity  
Meteorology: 0000Z 17 Jun 2013 - GDAS0p5
