# Supplementary material
Source: MDPI journal article supplement (https://www.mdpi.com/2072-4292/9/10/978)

August 4<sup>th</sup> 2013 (Day-7)

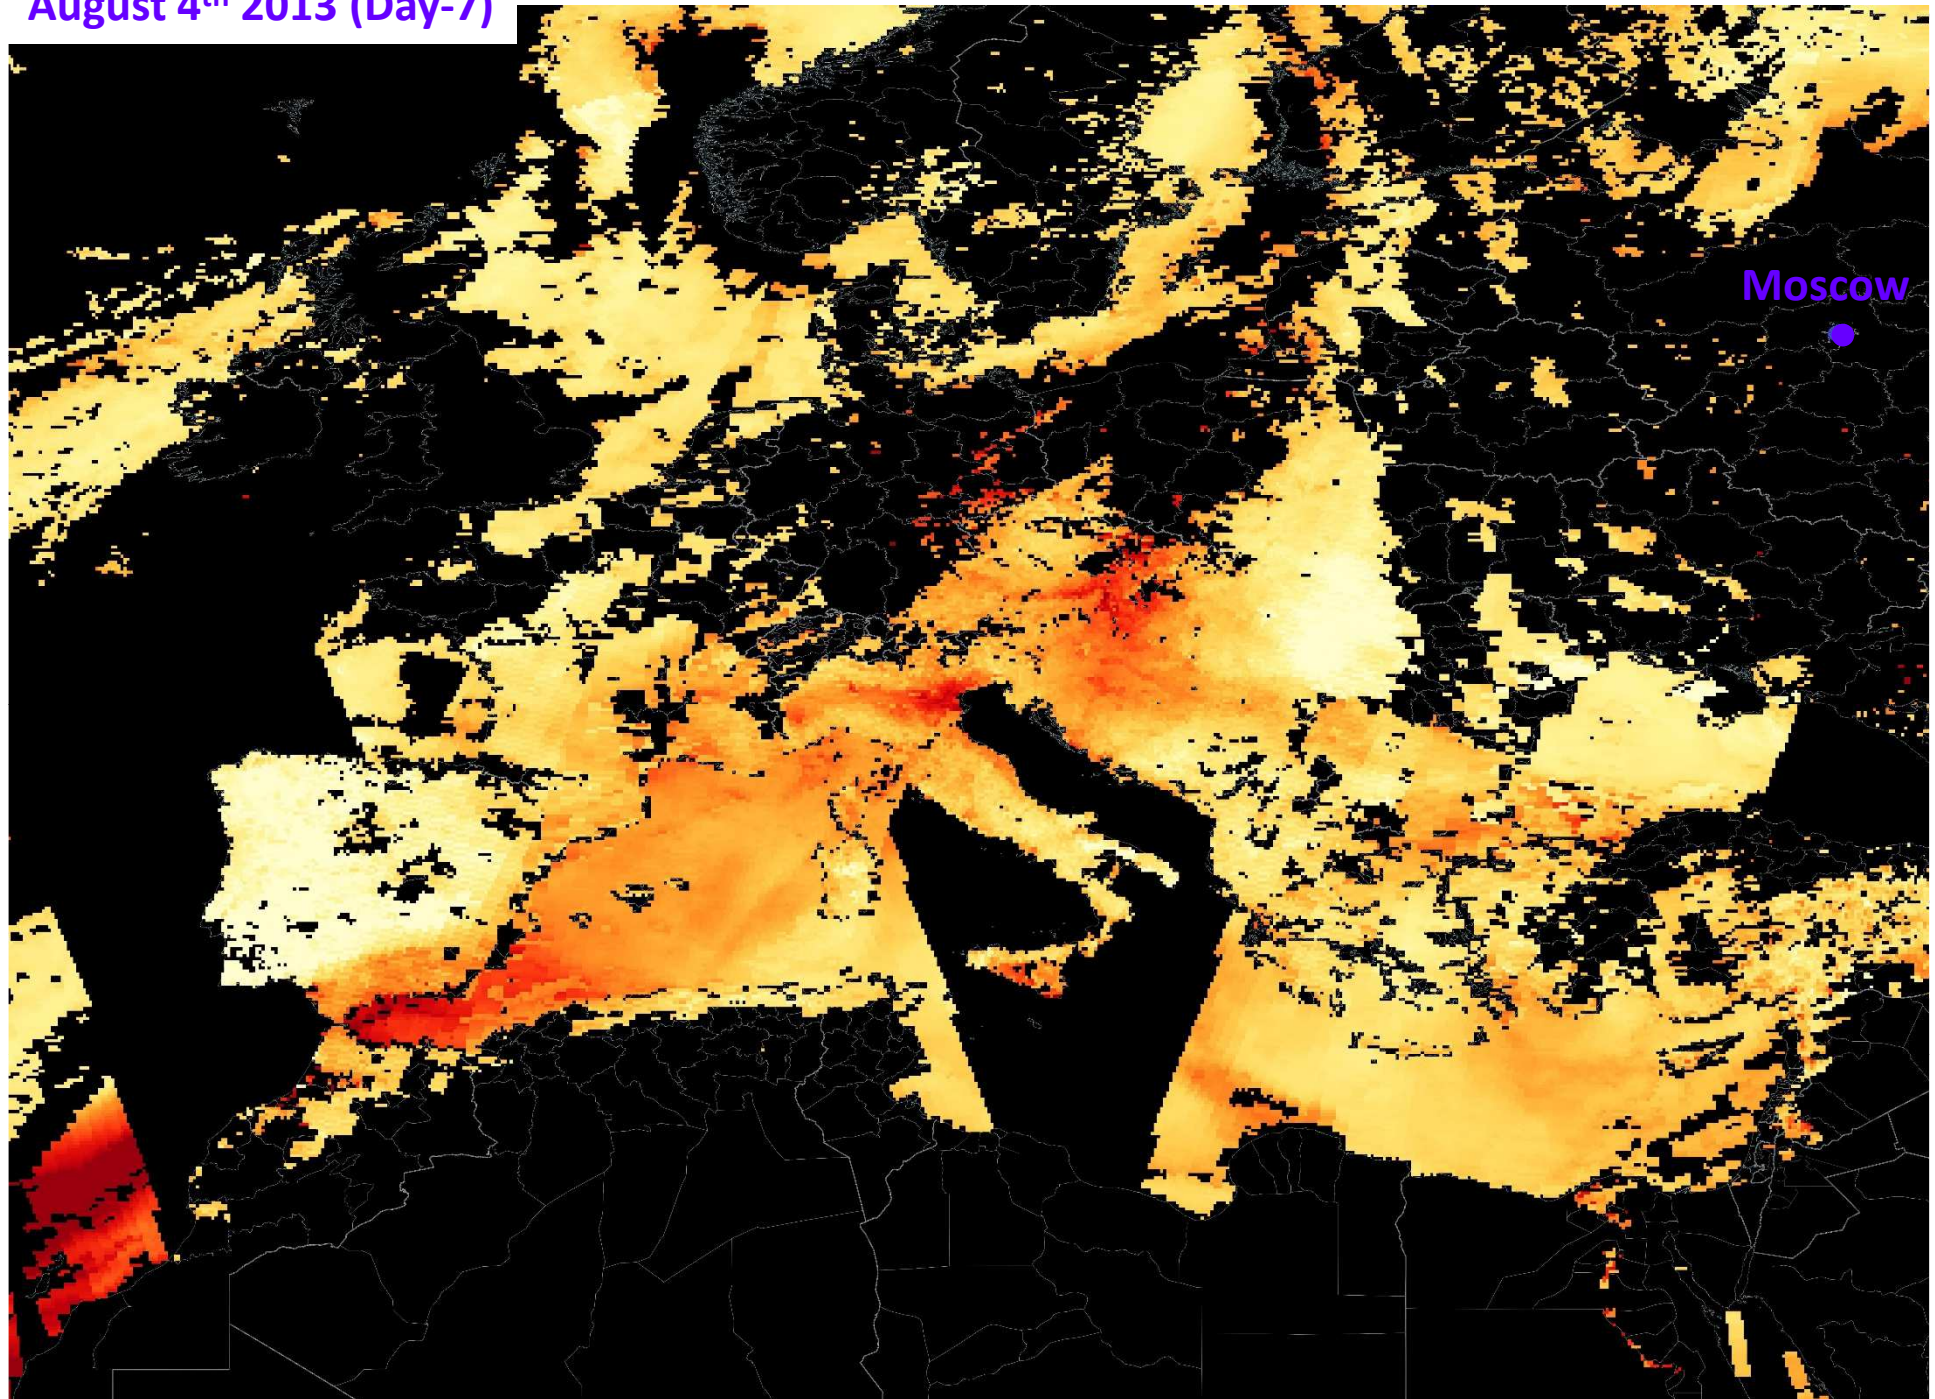



August 5<sup>th</sup> 2013 (Day-6)

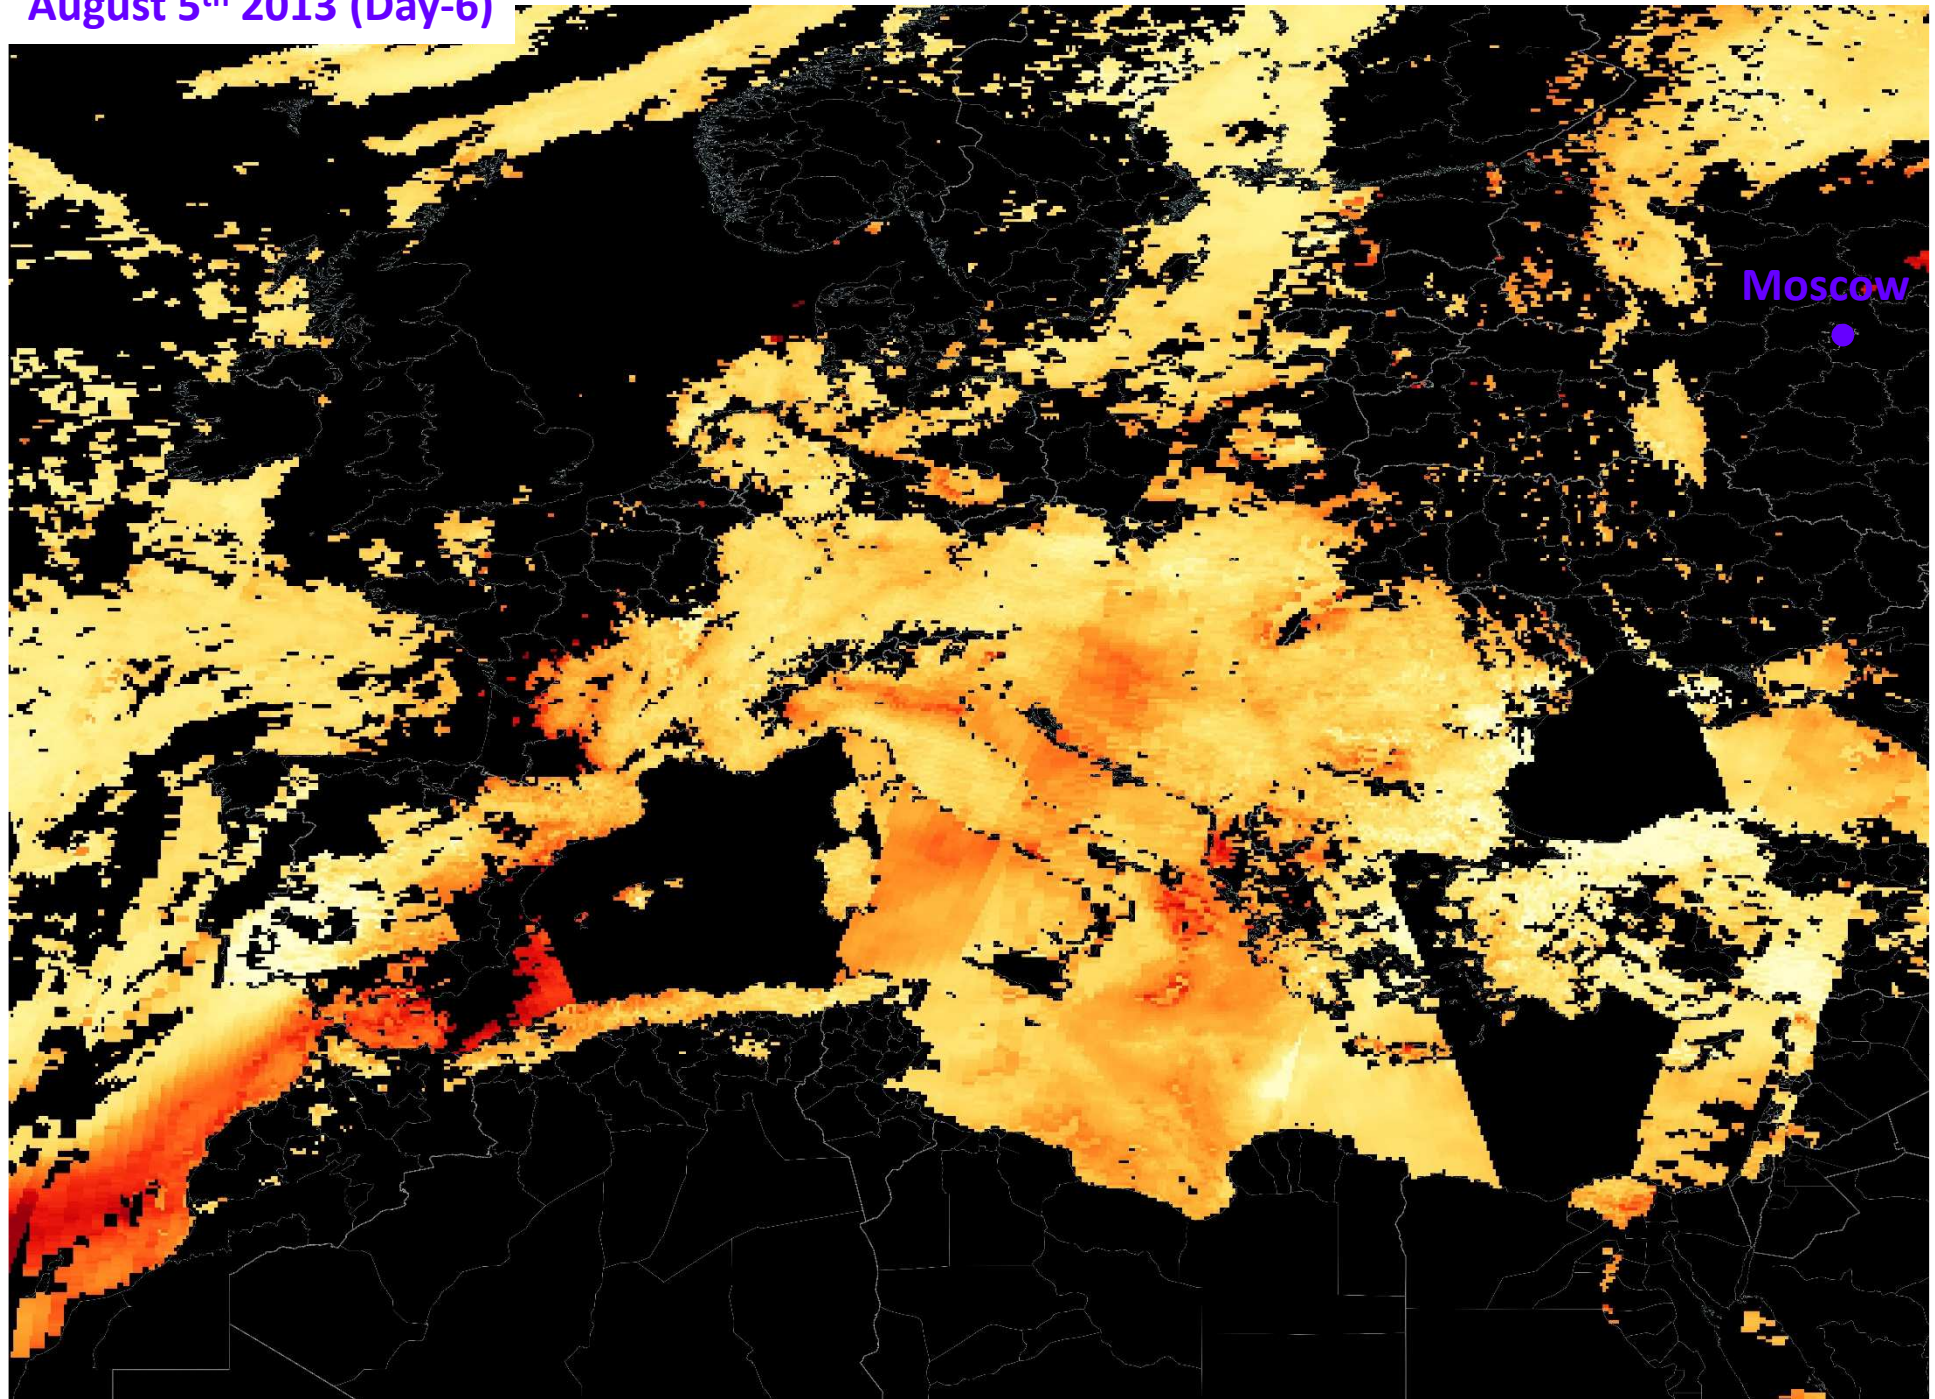



August 6<sup>th</sup> 2013 (Day-5)

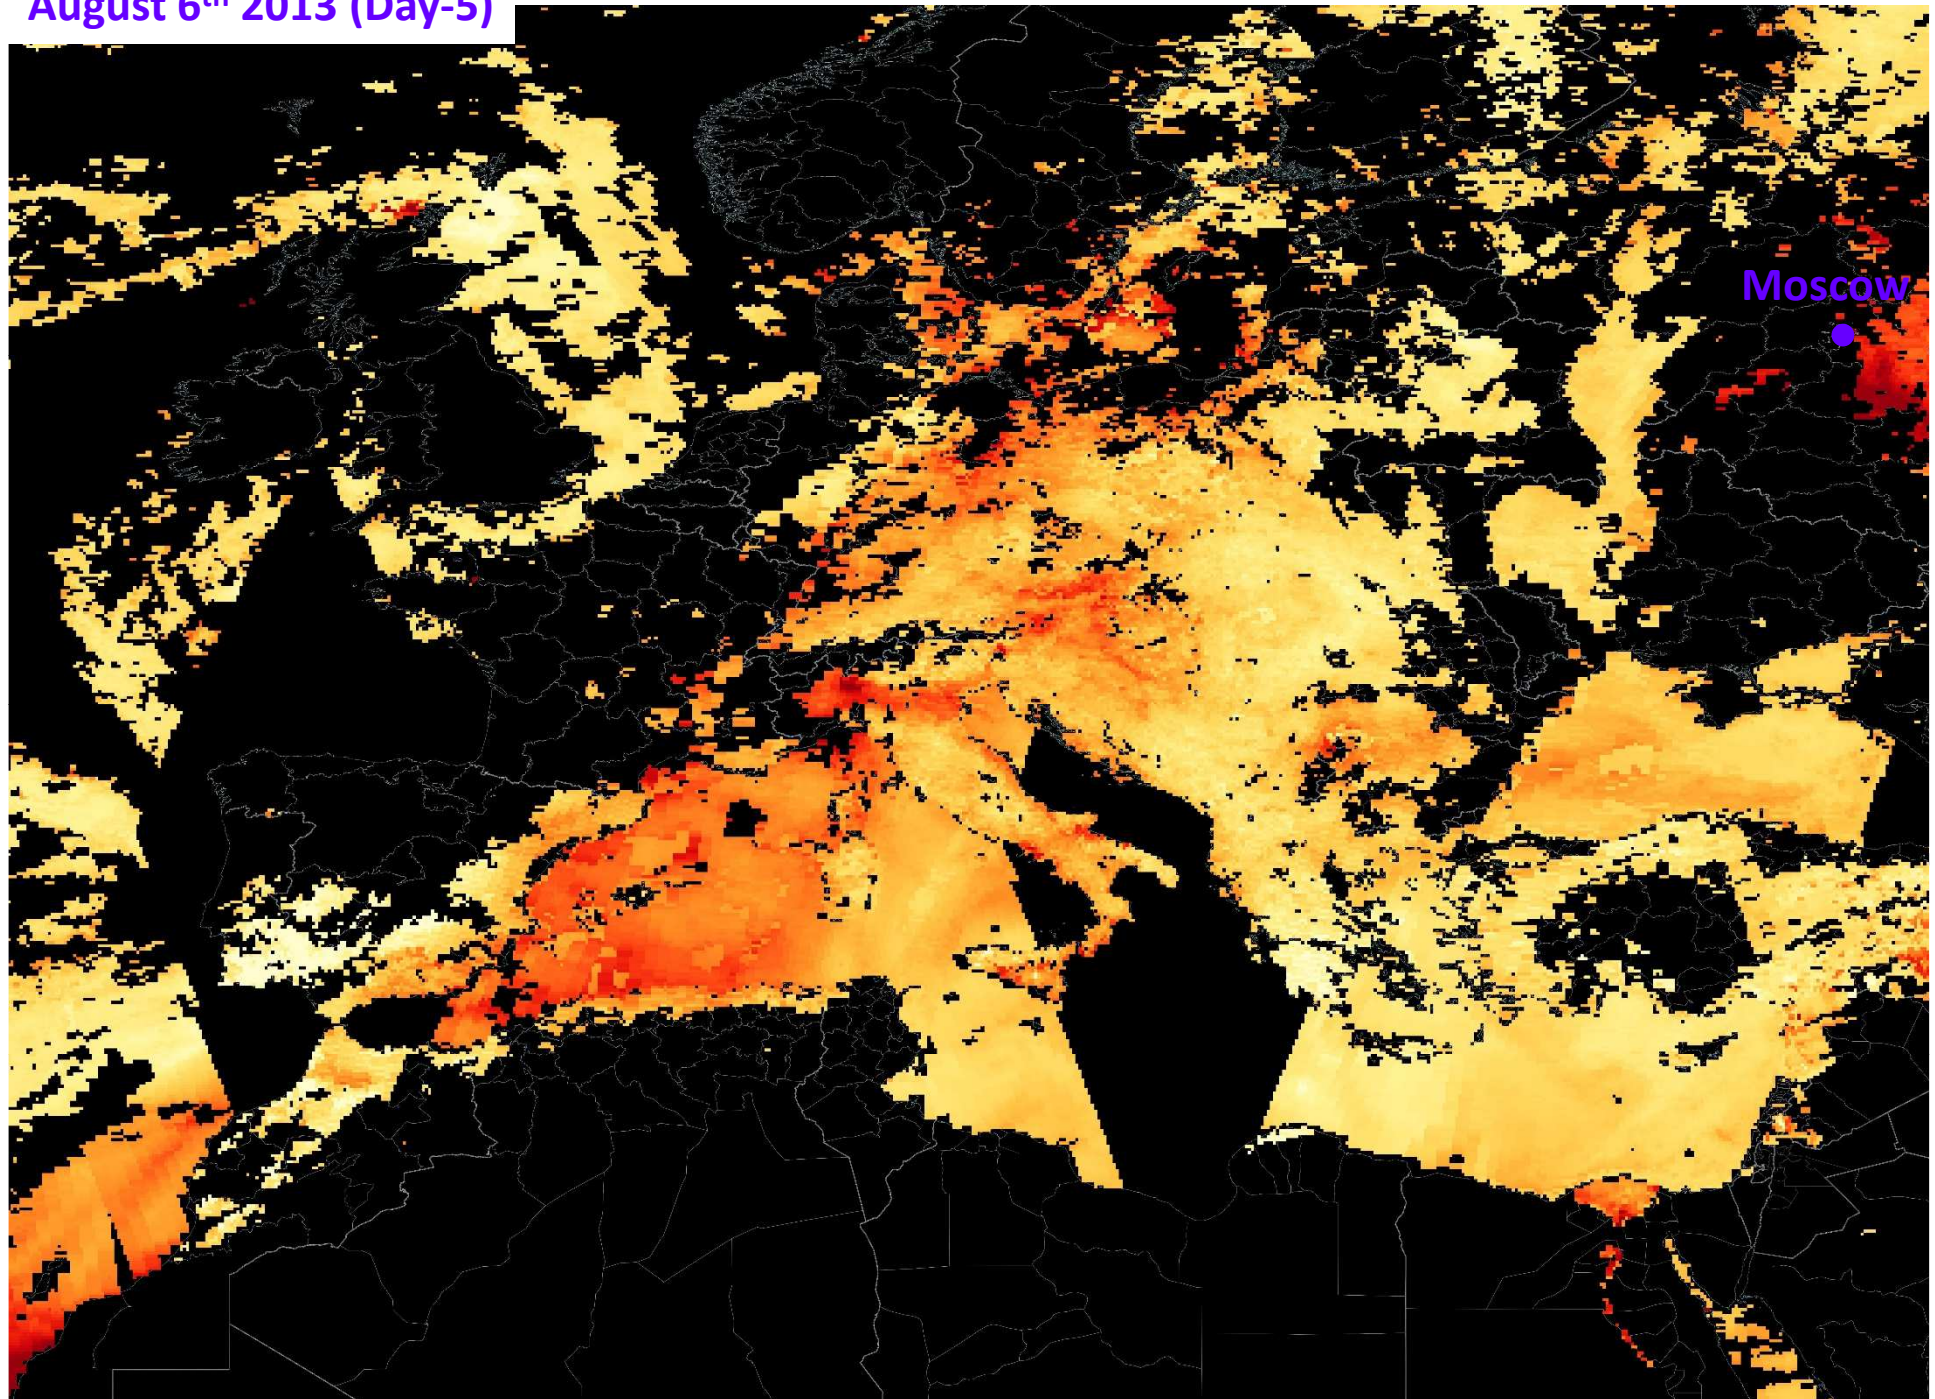



August 7<sup>th</sup> 2013 (Day-4)

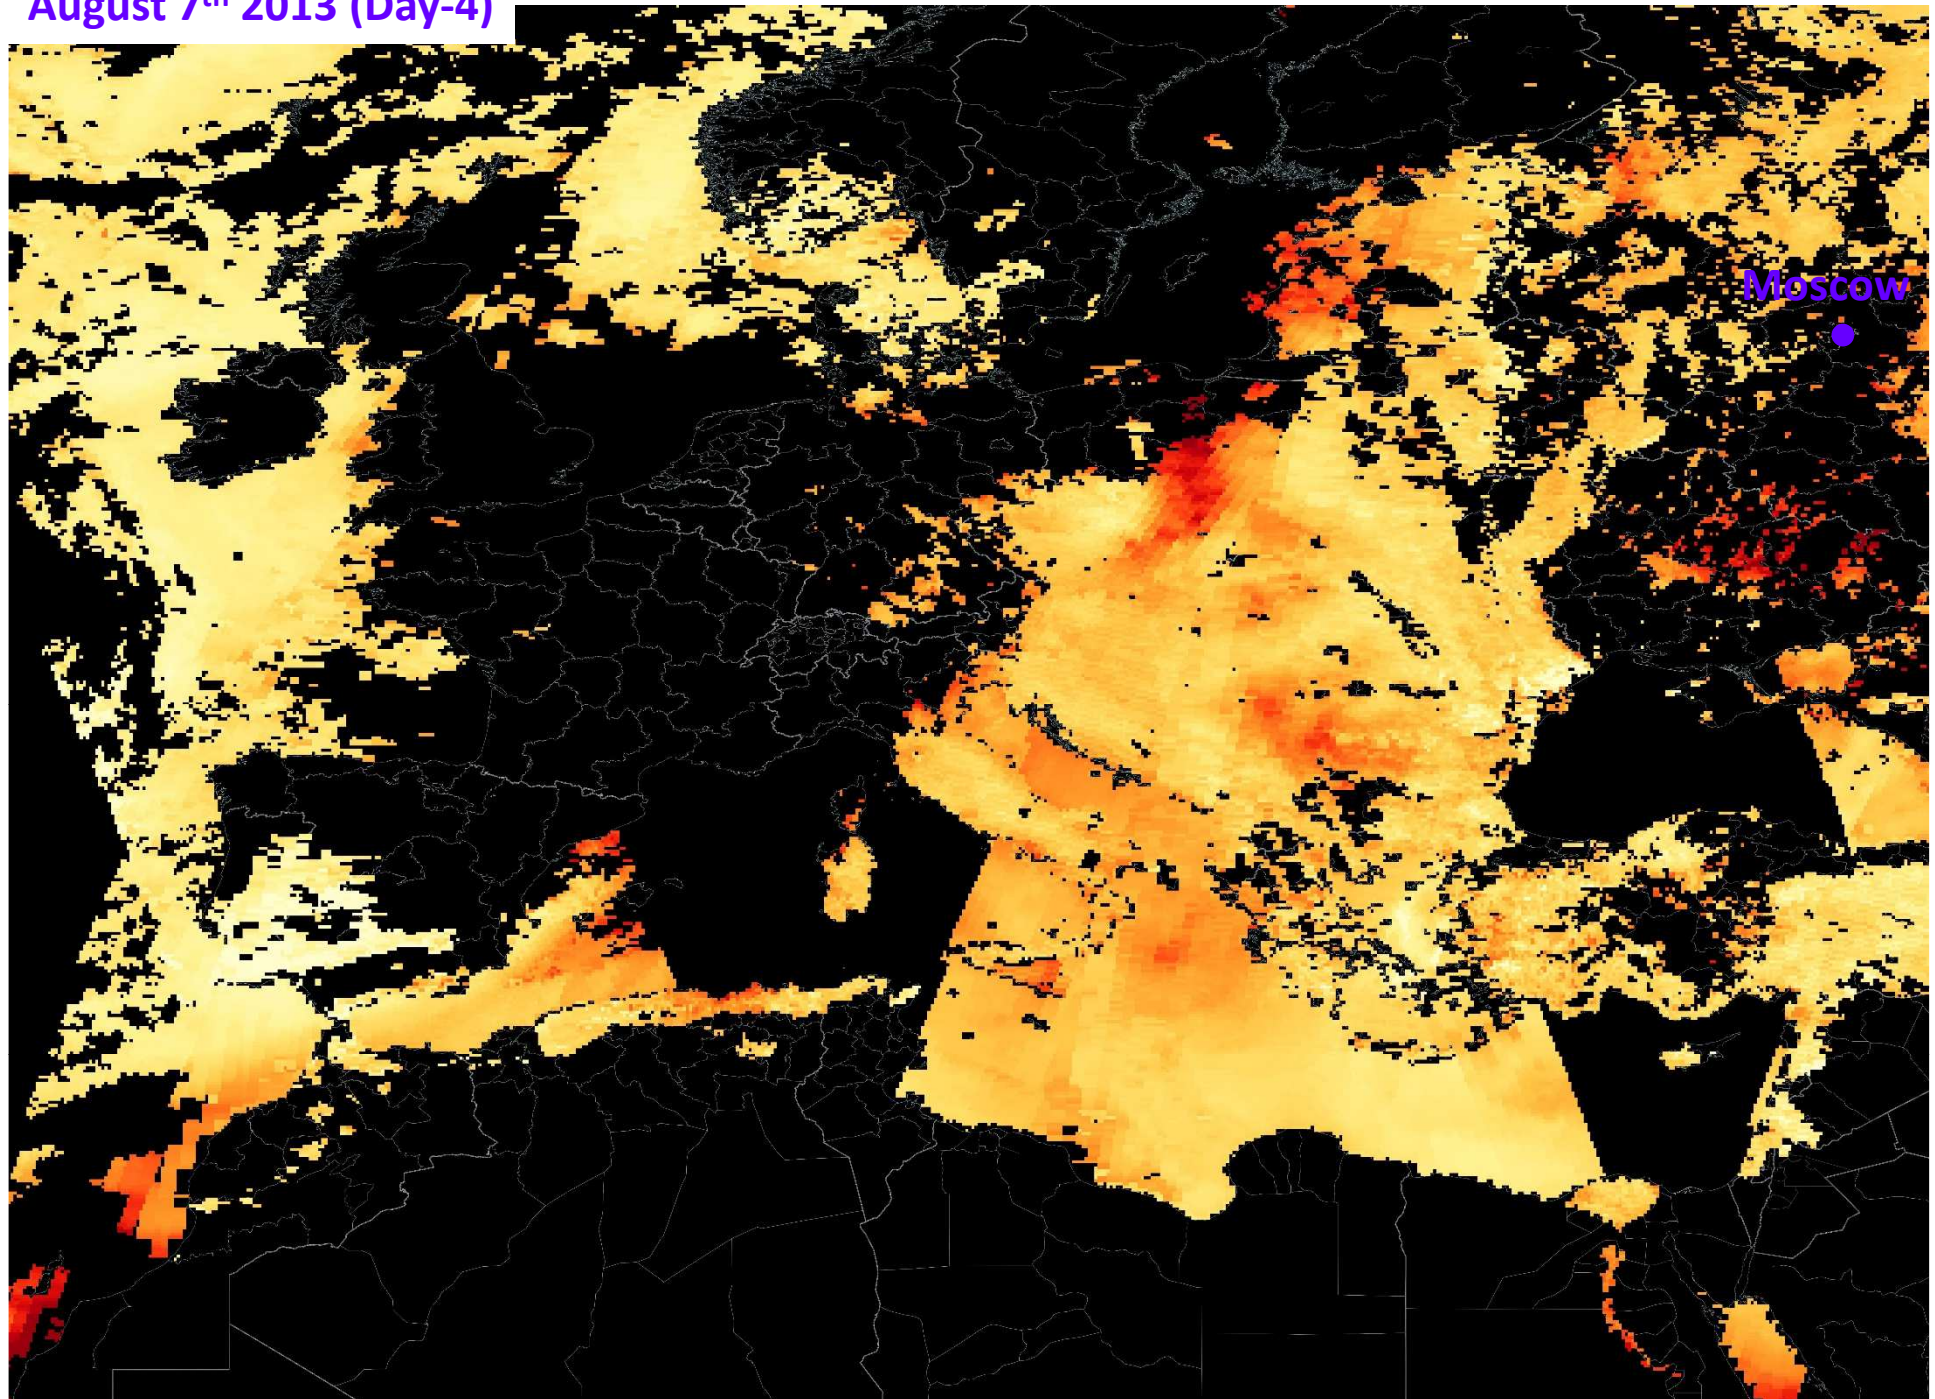



August 8<sup>th</sup> 2013 (Day-3)

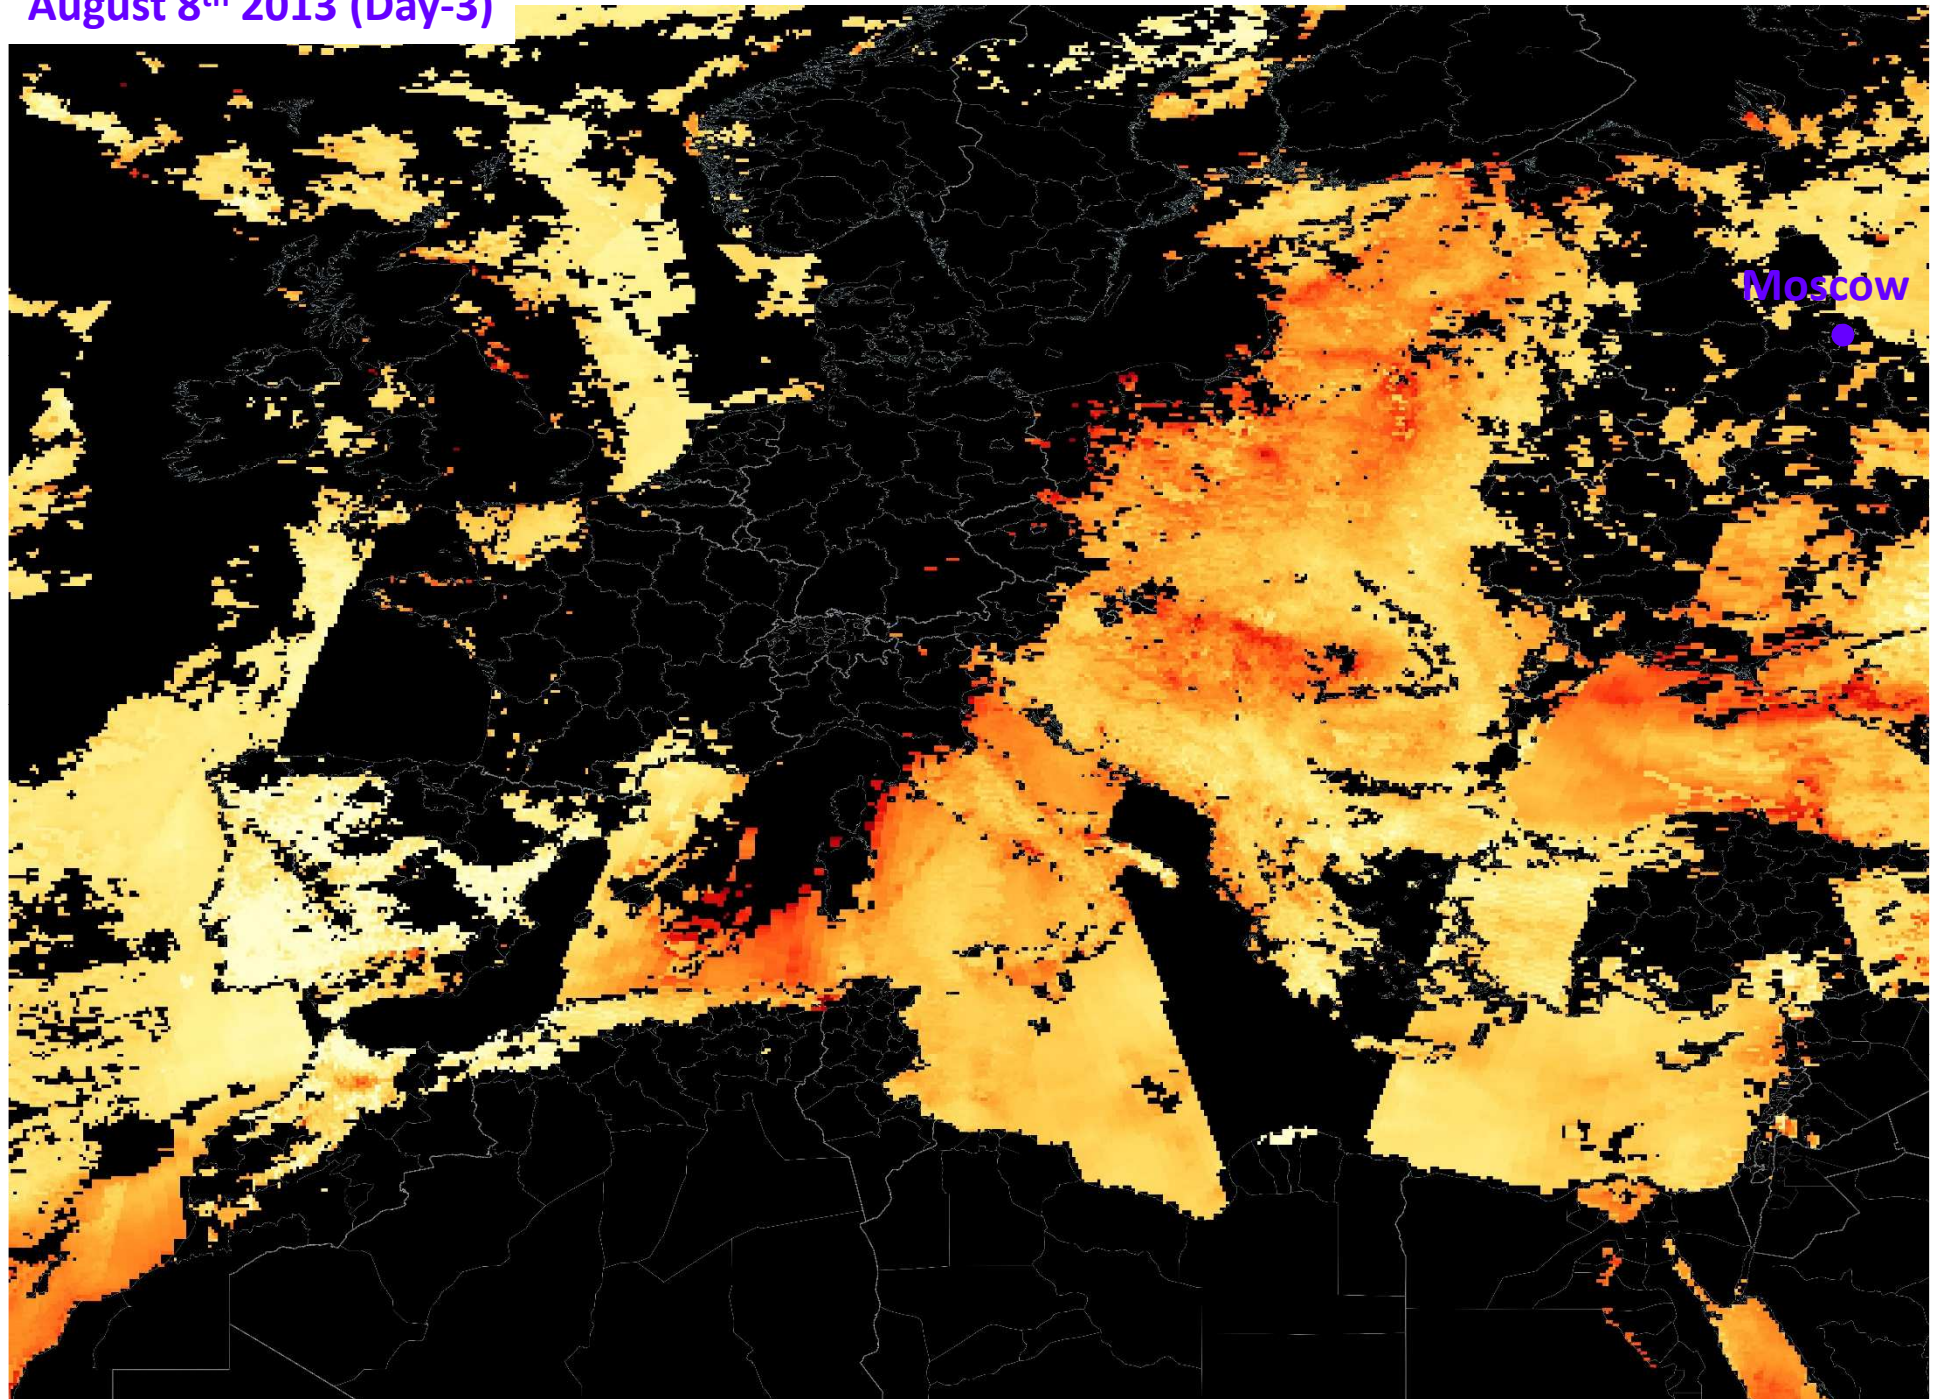



August 9<sup>th</sup> 2013 (Day-2)

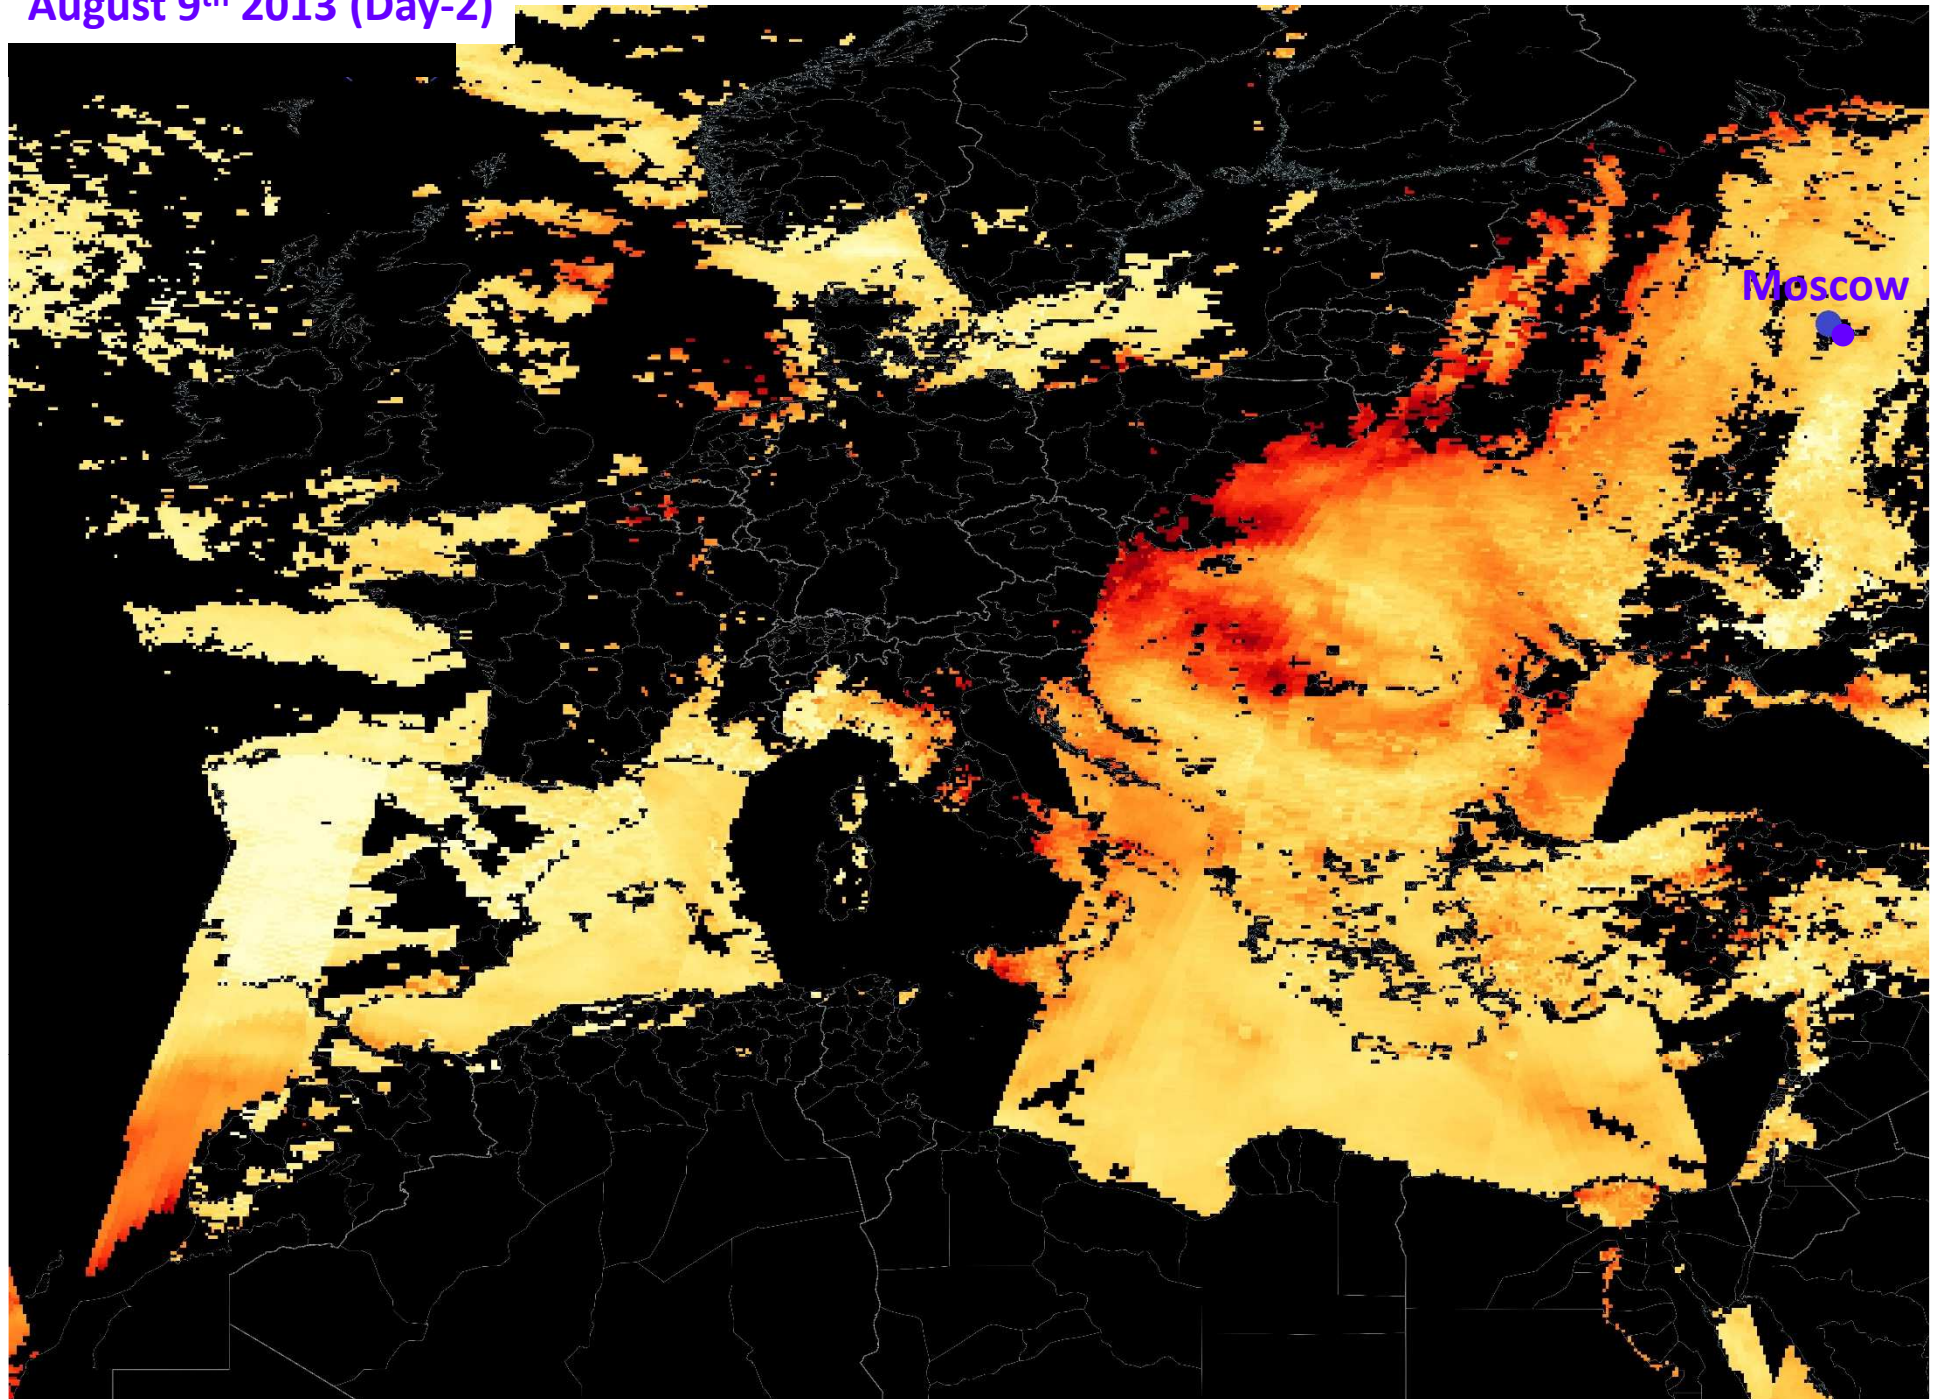



August 10<sup>th</sup> 2013 (Day-1)

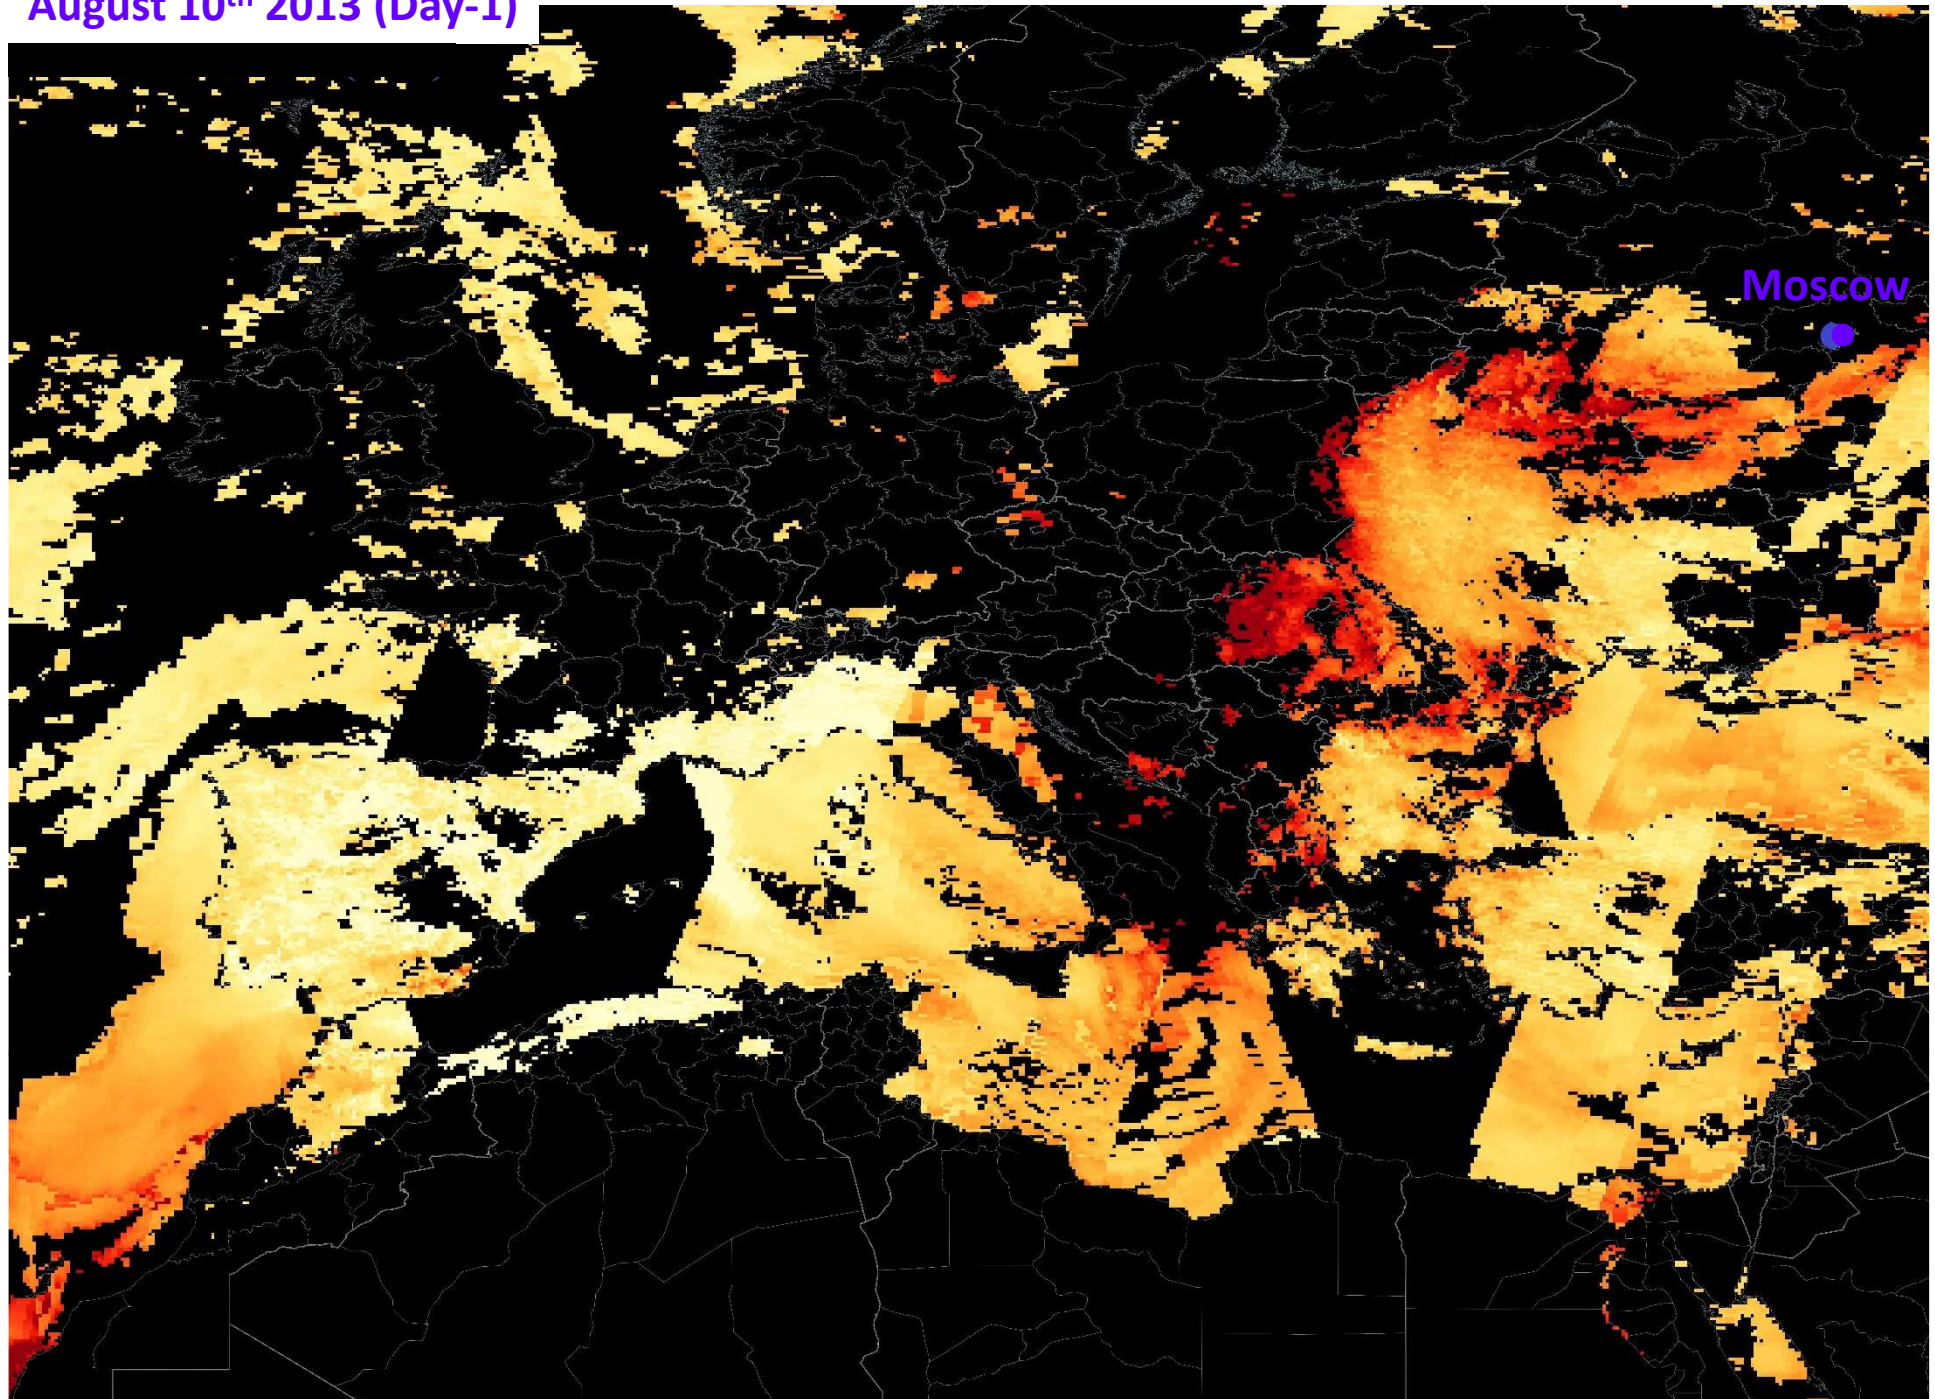



August 11<sup>th</sup> 2013 (Day of overpass)

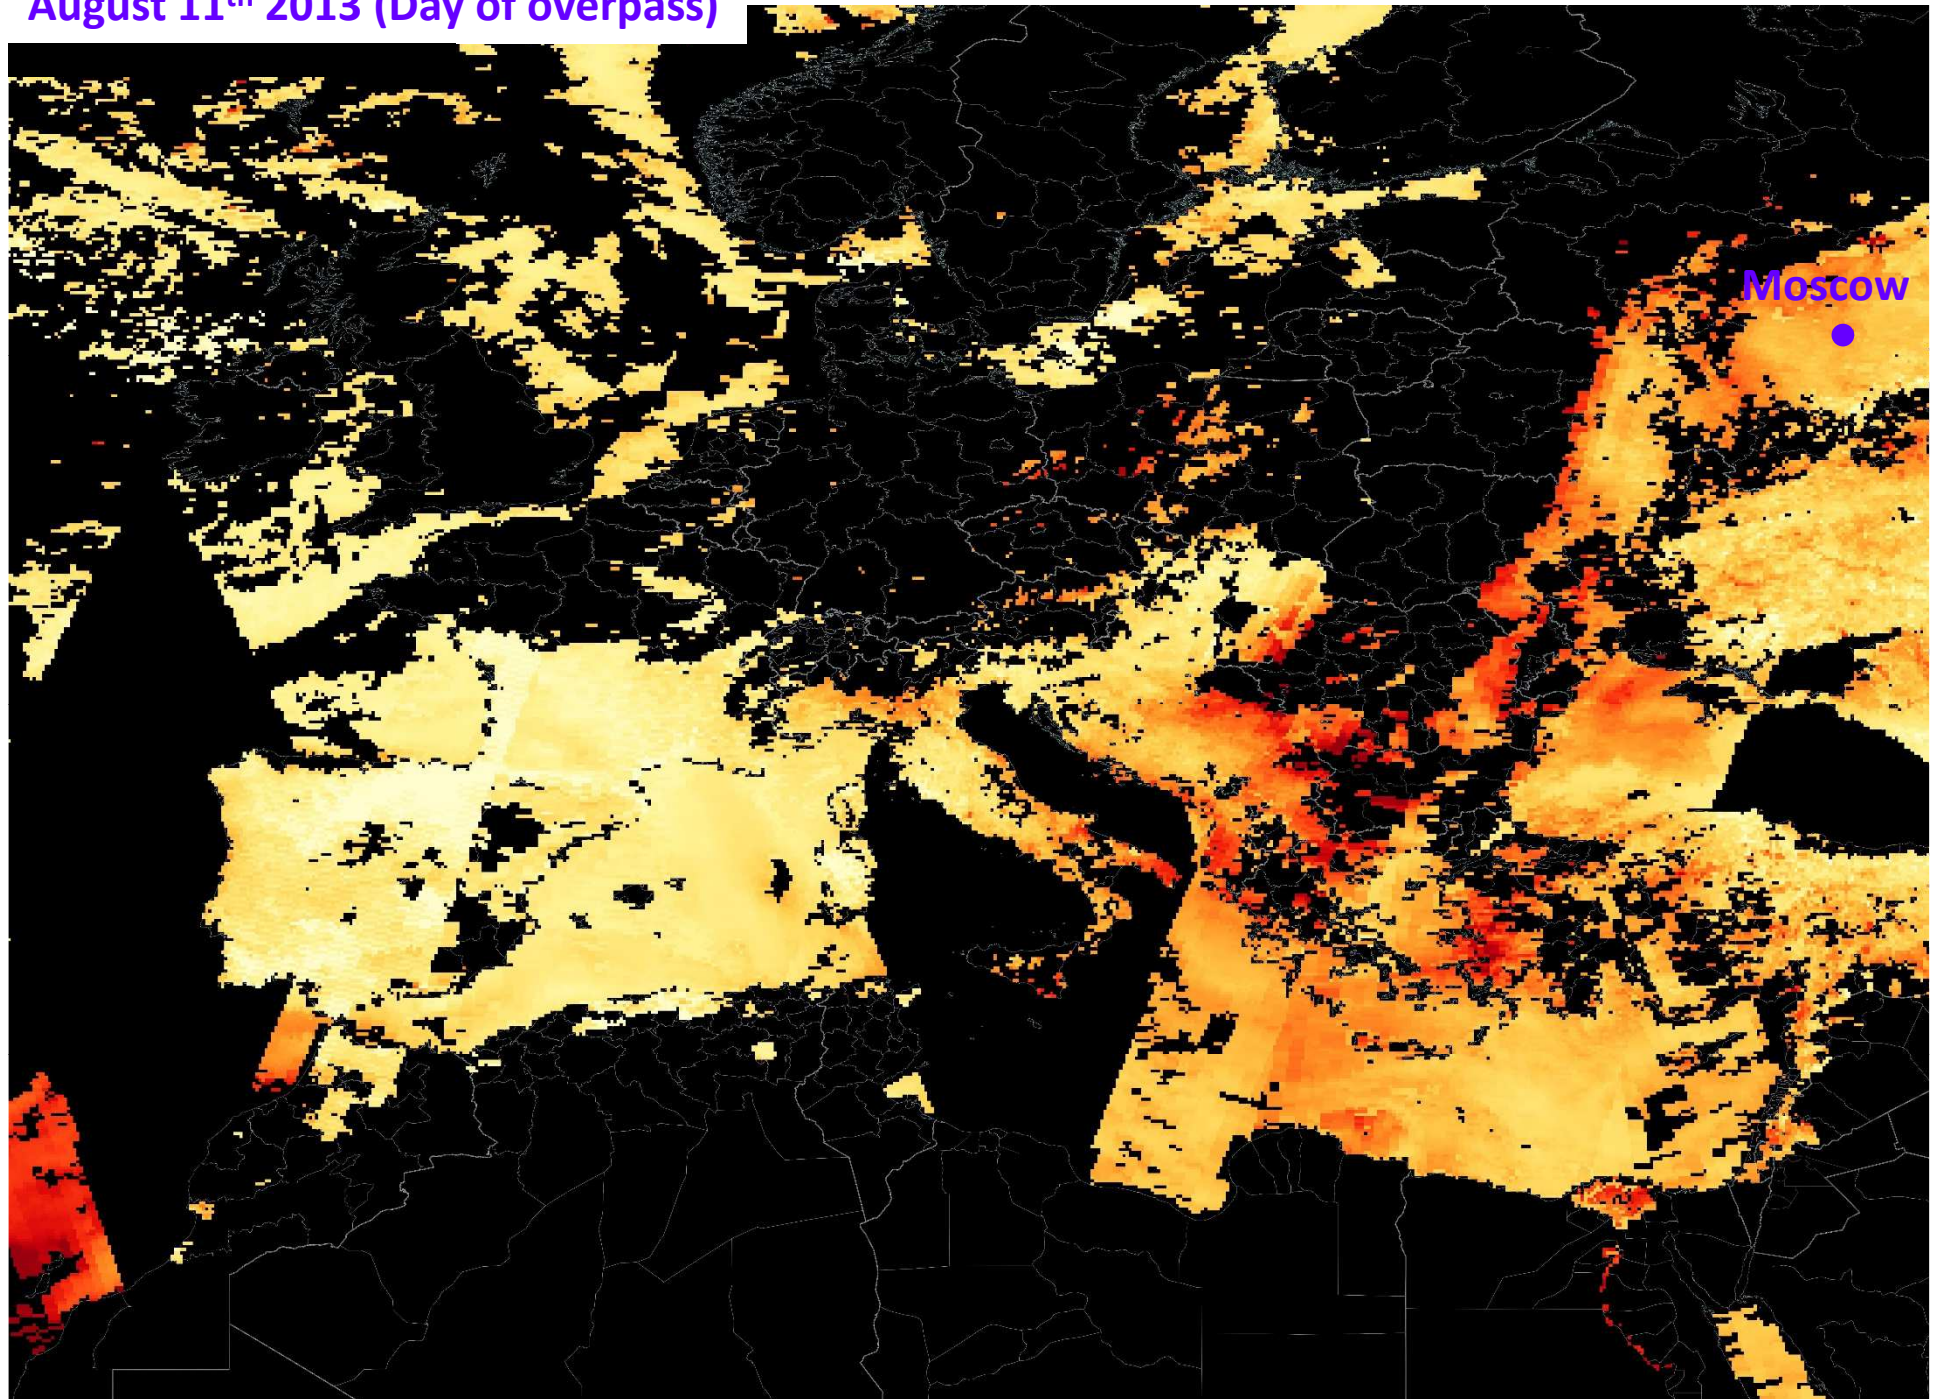

Supplement: s1 [file s1]
