# Supplementary material
Source: MDPI journal article supplement (https://www.mdpi.com/2072-4292/9/10/978)

NOAA HYSPLIT MODEL  
Backward trajectories ending at 1100 UTC 06 Jun 13  
GHDA Meteorological Data

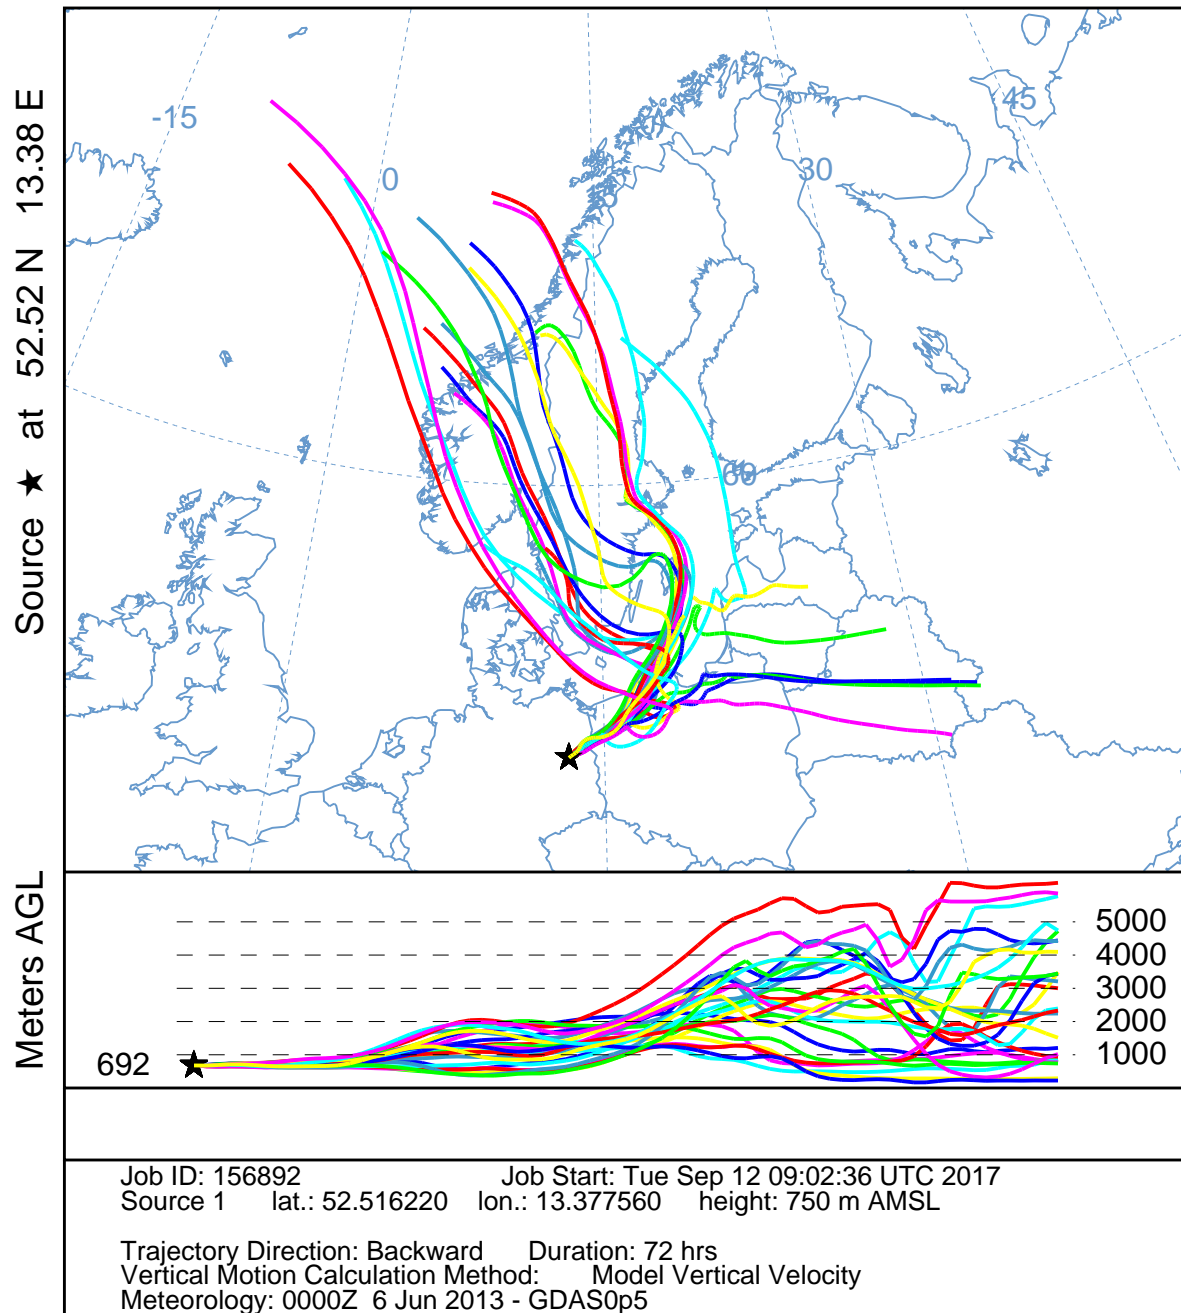

NOAA HYSPLIT MODEL  
Backward trajectories ending at 1100 UTC 06 Jun 13  
GHDA Meteorological Data

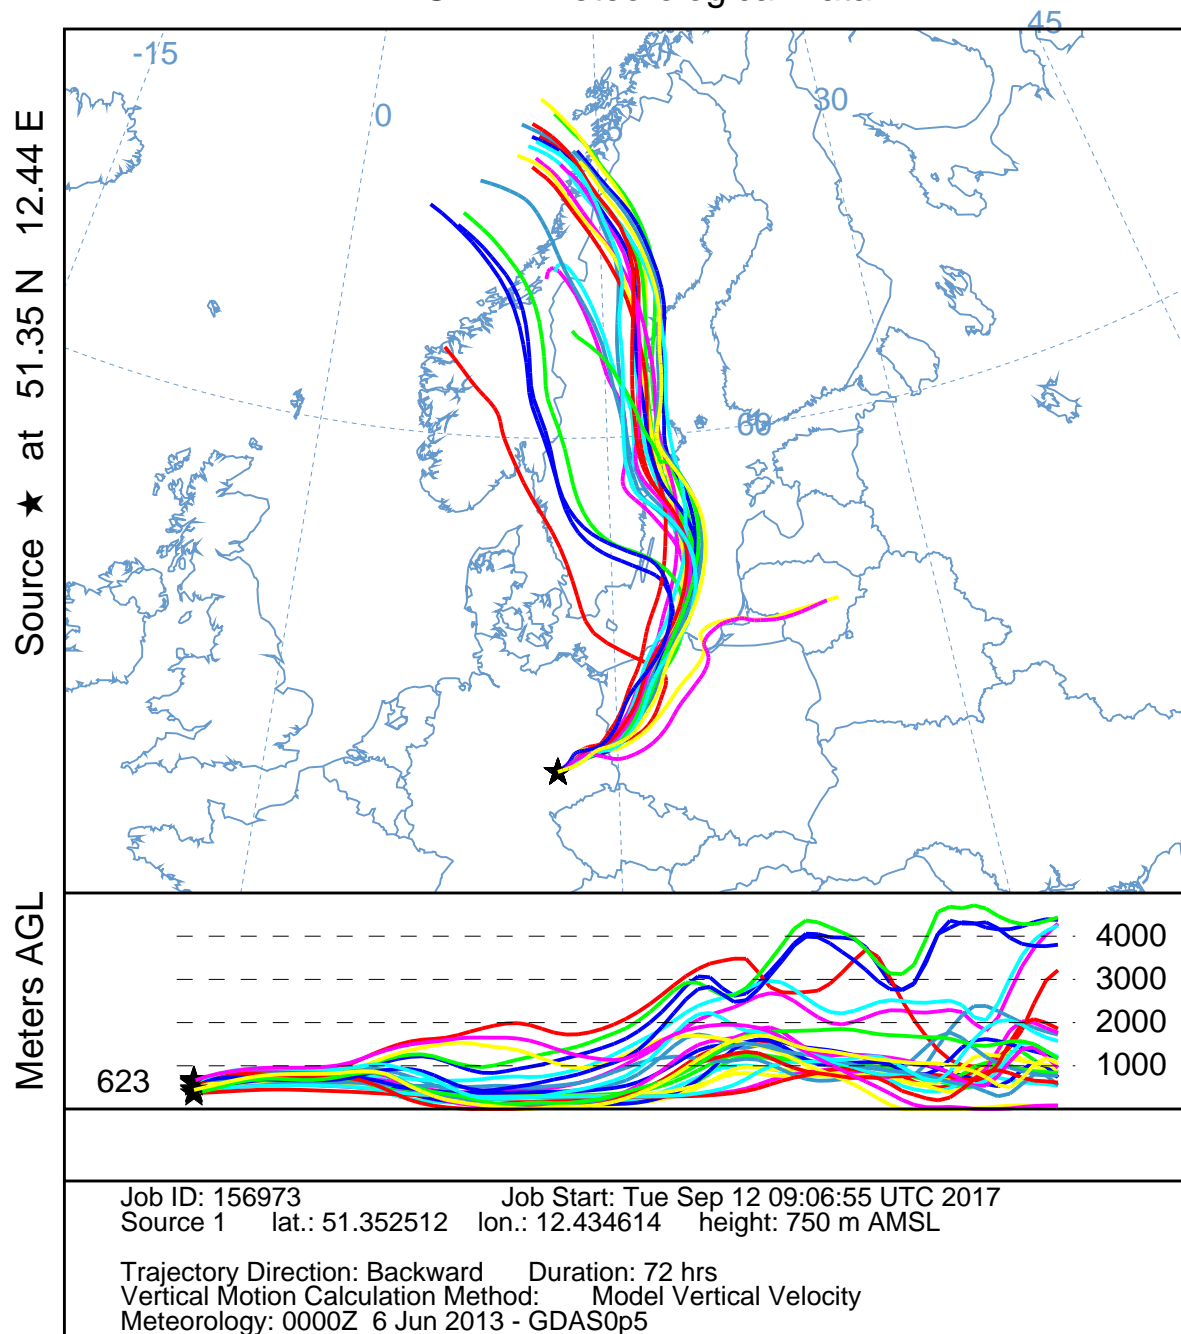

Supplement: s1 [file s1]
