# Supplementary material
Source: MDPI journal article supplement (https://www.mdpi.com/2072-4292/9/10/978)

NOAA HYSPLIT MODEL  
Backward trajectories ending at 1000 UTC 11 Aug 13  
GFSG Meteorological Data

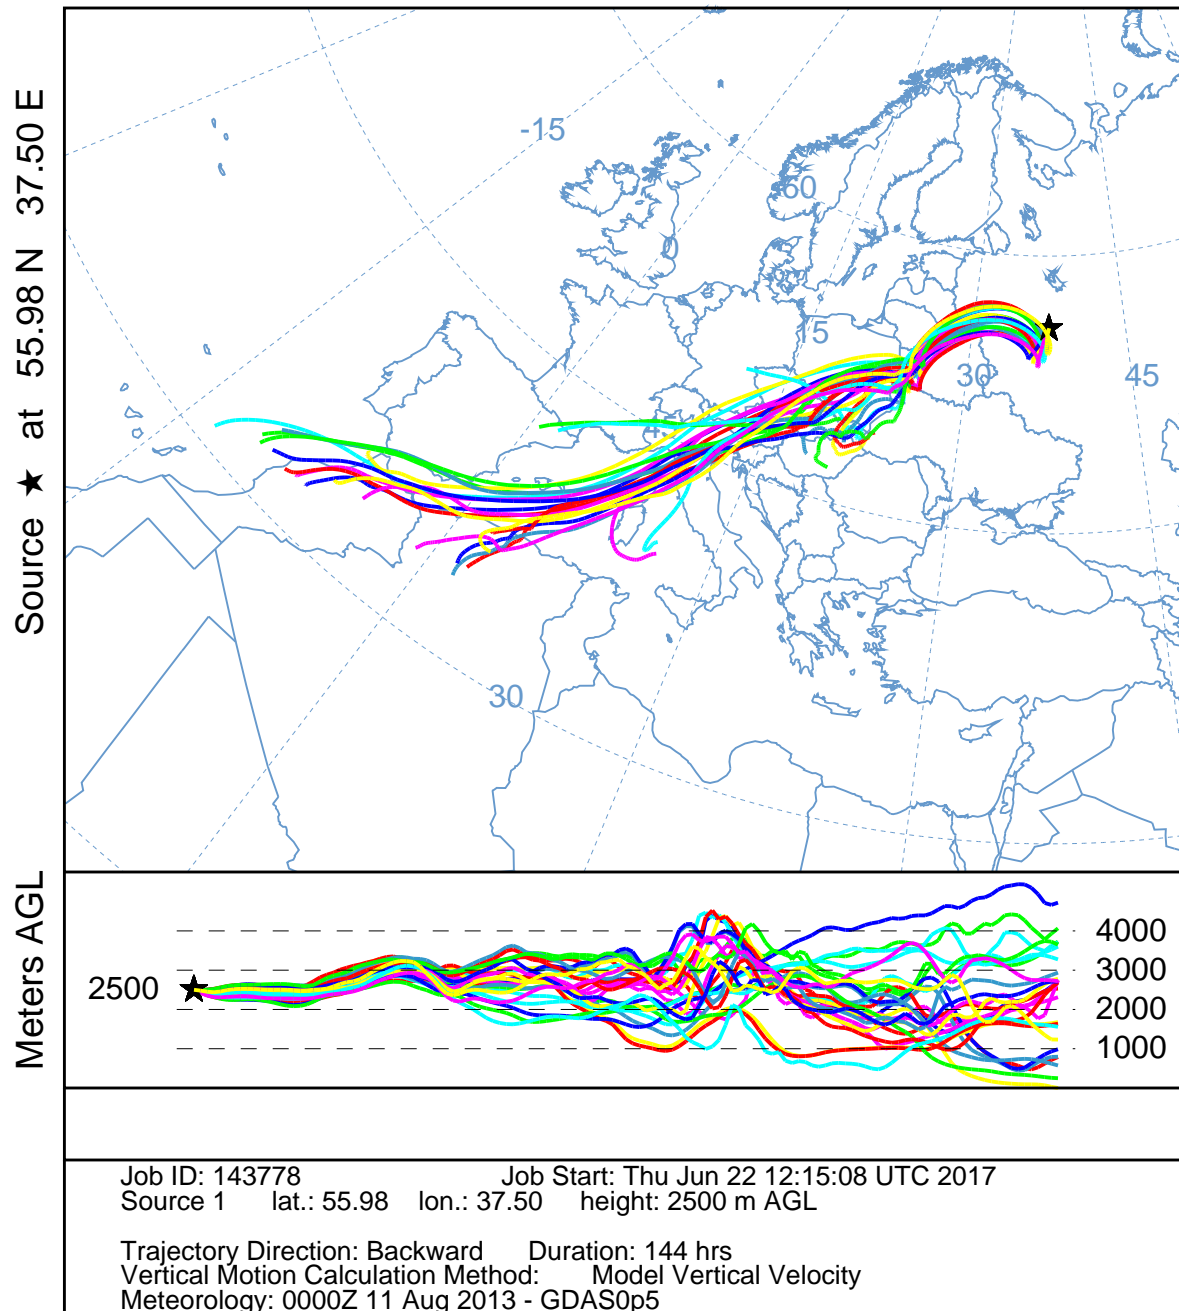

NOAA HYSPLIT MODEL  
Backward trajectories ending at 1000 UTC 11 Aug 13  
GFSG Meteorological Data

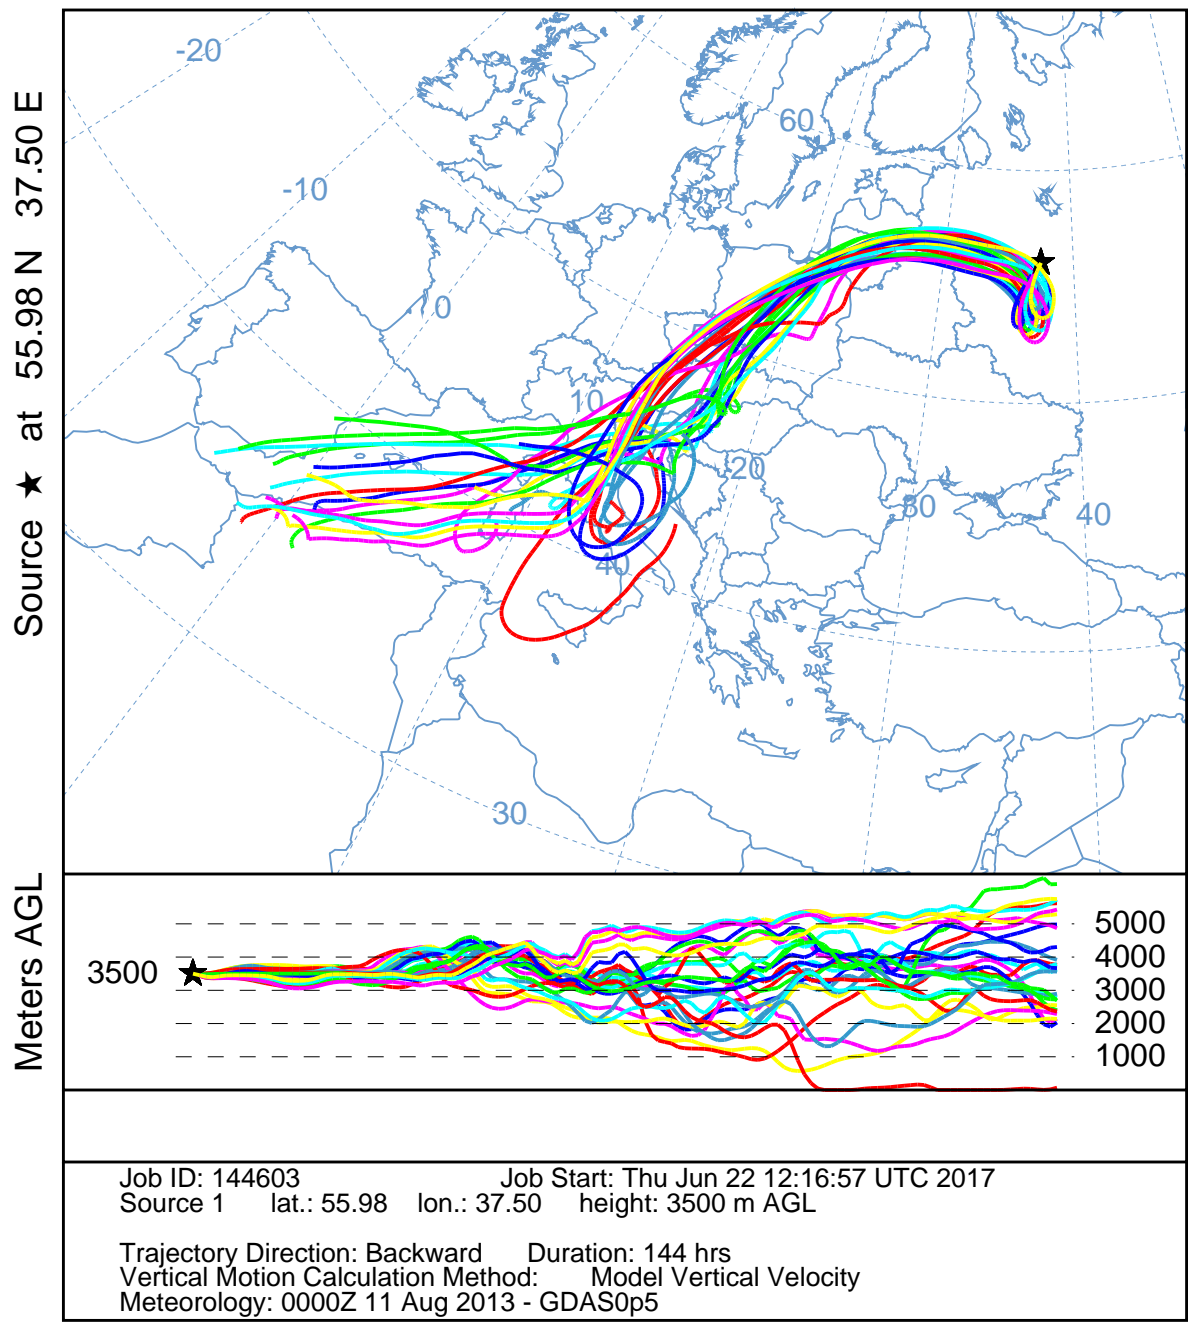

Supplement: s1 [file s1]
