# Supplementary material
Source: MDPI journal article supplement (https://www.mdpi.com/2072-4292/9/10/978)
Supplement: s1 [file s1]

Archive with 4 entries (4 files):
- figure_S1.pdf
- figure_S2.pdf
- figure_S3.pdf
- figure_S4.pdf
