# Supplementary material
Source: MDPI journal article supplement (https://www.mdpi.com/2072-4292/9/10/978)

NOAA HYSPLIT MODEL  
Backward trajectories ending at 0300 UTC 17 Jun 13  
GHDA Meteorological Data

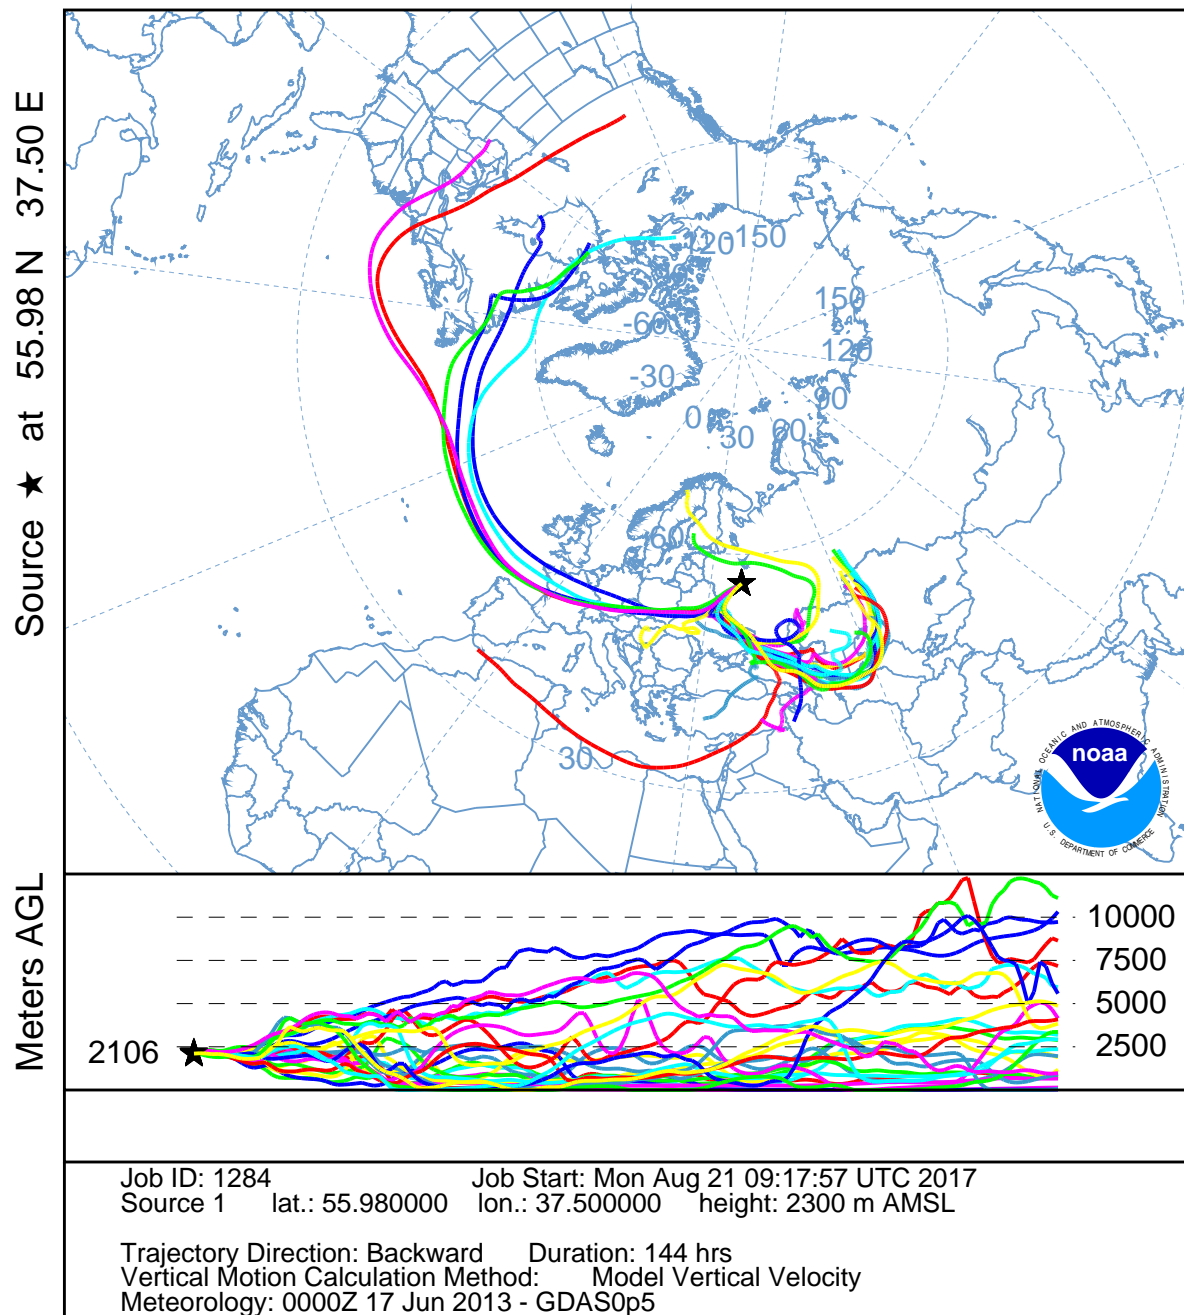

Supplement: s1 [file s1 › figure_S2.pdf]
